# Supplementary material for: Characterization of the Blood–Brain Barrier Integrity and the Brain Transport of SN-38 in an Orthotopic Xenograft Rat Model of Diffuse Intrinsic Pontine Glioma
Source: Pharmaceutics. 2020 Apr 27;12(5):399. doi: 10.3390/pharmaceutics12050399 (PMC7284501; doi:10.3390/pharmaceutics12050399)
Supplement: Supplementary file 1 [file pharmaceutics-12-00399-s001.pdf]

| Protein      | Species Specificity | Peptide Sequence | Isotope Type | Precursor M/z | Precursor Charge | Product M/z | Product Charge | Fragment Ion Type |
|--------------|---------------------|------------------|--------------|---------------|------------------|-------------|----------------|-------------------|
| BCRP (ABCG2) | Human, Mouse, Rat   | SSLLDVLAAR       | light        | 522.8         | 2                | 757.5       | 1              | y7                |
|              |                     |                  |              |               |                  | 644.4       | 1              | y6                |
|              |                     |                  |              |               |                  | 529.3       | 1              | y5                |
|              |                     |                  |              |               |                  | 430.3       | 1              | y4                |
|              |                     | SSLLDVLAAR       | heavy        | 524.8         | 2                | 761.5       | 1              | y7                |
|              |                     |                  |              |               |                  | 648.4       | 1              | y6                |
|              |                     |                  |              |               |                  | 533.4       | 1              | y5                |
|              |                     |                  |              |               |                  | 434.3       | 1              | y4                |
| P-gp (ABCB1) | Human, Mouse, Rat   | LANDAAQVK        | light        | 465.3         | 2                | 816.4       | 1              | y8                |
|              |                     |                  |              |               |                  | 745.4       | 1              | y7                |
|              |                     |                  |              |               |                  | 631.3       | 1              | y6                |
|              |                     |                  |              |               |                  | 516.3       | 1              | y5                |
|              |                     | LANDAAQVK        | heavy        | 468.3         | 2                | 822.4       | 1              | y8                |
|              |                     |                  |              |               |                  | 751.4       | 1              | y7                |
|              |                     |                  |              |               |                  | 637.4       | 1              | y6                |
|              |                     |                  |              |               |                  | 522.3       | 1              | y5                |

|              |            |           |       |       |   |       |   |    |
|--------------|------------|-----------|-------|-------|---|-------|---|----|
| MRP1 (ABCC1) | Human, Rat | TPSGNLVNR | Light | 479.3 | 2 | 759.4 | 1 | y7 |
|              |            |           |       |       |   | 672.4 | 1 | y6 |
|              |            |           |       |       |   | 615.4 | 1 | y5 |
|              |            |           |       |       |   | 501.3 | 1 | y4 |
|              |            |           |       |       |   | 766.4 | 1 | y7 |
|              |            | TPSGNLVNR | Heavy | 482.8 | 2 | 679.4 | 1 | y6 |
|              |            |           |       |       |   | 622.4 | 1 | y5 |
|              |            |           |       |       |   | 508.3 | 1 | y4 |
|              |            |           |       |       |   | 786.4 | 1 | y6 |
|              |            |           |       |       |   | 697.4 | 1 | y5 |
| MRP4 (ABCC4) | Human, Rat | APVLFFDR  | Light | 482.8 | 2 | 584.3 | 1 | y4 |
|              |            |           |       |       |   | 537.2 | 1 | y3 |
|              |            |           |       |       |   | 803.5 | 1 | y6 |
|              |            | APVLFFDR  | Heavy | 486.3 | 2 | 704.4 | 1 | y5 |
|              |            |           |       |       |   | 584.3 | 1 | y4 |
|              |            |           |       |       |   | 437.2 | 1 | y3 |
|              |            | GLVEGASVK | Light | 430.2 | 2 | 802.5 |   | y8 |
|              |            |           |       |       |   | 689.4 |   | y7 |
|              |            |           |       |       |   | 590.3 |   | y6 |
|              |            |           |       |       |   | 461.3 |   | y5 |
| NESTIN       | Human      | GLVEGASVK | Heavy | 442.3 | 2 | 826.5 |   | y8 |
|              |            |           |       |       |   | 713.4 |   | y7 |
|              |            |           |       |       |   | 608.3 |   | y6 |
|              |            |           |       |       |   | 479.3 |   | y5 |
